# Analysis of diffusion tensor imaging data from UK Biobank confirms dosage effect of 15q11.2 copy-number variation on white matter and shows association with cognition

**Short title:** 15q11.2 CNV effects on white matter and cognition

Ana I. Silva<sup>1,2,3</sup>, George Kirov<sup>1</sup>, Kimberley M. Kendall<sup>1</sup>, Mathew Bracher-Smith<sup>1</sup>, Lawrence S. Wilkinson<sup>1,4,5</sup>, Jeremy Hall<sup>1,5</sup>, Magnus O. Ulfarsson<sup>6,7</sup>, G. Bragi Walters<sup>6,8</sup>, Hreinn Stefansson<sup>6</sup>, Kari Stefansson<sup>6,8</sup>, David E. J. Linden<sup>2,1\*</sup>, Xavier Caseras<sup>1\*</sup>

**\* Shared senior authorship**

<sup>1</sup> Neuroscience and Mental Health Research Institute, MRC Centre for Neuropsychiatric Genetics and Genomics, Hadyn Ellis Building, Cathays, Cardiff, CF24 4HQ

<sup>2</sup> School for Mental Health and Neuroscience, Dept. of Psychiatry and Neuropsychology, Faculty of Health, Medicine and Life Sciences, Maastricht University, Maastricht, The Netherlands

<sup>3</sup> Cardiff University Brain Research Imaging Centre School of Psychology, Cardiff University, Maindy Road, Cardiff, CF24 4HQ

<sup>4</sup> Division of Psychological Medicine and Clinical Neurosciences (DPMCN), School of Medicine, Cardiff University, Cardiff, UK

<sup>5</sup> School of Psychology, Cardiff University, Cardiff, Park Place, CF10 3AT

<sup>6</sup> deCODE genetics/Amgen, Sturlugata 8, IS-102 Reykjavík, Iceland

<sup>7</sup> Faculty of Electrical and Computer Engineering, University of Iceland.

<sup>8</sup> Faculty of Medicine, University of Iceland, Reykjavik, Iceland

**Correspondent authors:** Ana I. Silva and Xavier Caseras

E-mail address: [silvaai@cardiff.ac.uk](mailto:silvaai@cardiff.ac.uk); [caserasx@cardiff.ac.uk](mailto:caserasx@cardiff.ac.uk)

Phone number: +44 (0)29 2068 8437

Address: Neuroscience and Mental Health Research Institute, MRC Centre for Neuropsychiatric Genetics and Genomics, Hadyn Ellis Building, Cathays, Cardiff, CF24 4HQ

**Keywords:** 15q11.2 BP1-BP2; diffusion tensor imaging; genetics; copy number variant, CYFIP1; cognition

# Abstract

**Background:** Copy-number variations at the 15q11.2 BP1-BP2 locus are present in 0.5 to 1.0% of the population, and the deletion is associated with a range of neurodevelopmental disorders. Previously, we showed a reciprocal effect of 15q11.2 copy-number variation on fractional anisotropy, with widespread increases in deletion carriers. We aim to replicate and expand these findings, using a larger sample of participants (n=30,930), higher resolution imaging, and examining the implications for cognitive performance.

**Methods:** Diffusion tensor imaging measures from participants with no neurological/psychiatric diagnoses were obtained from the UK Biobank database. We compared 15q11.2 BP1-BP2 deletion (n=103) and duplication (n=119) carriers to a large cohort of control individuals with no neuropsychiatric copy-number variants (n=29,870). Additionally, we assessed how changes in white matter mediated the association between carrier status and cognitive performance.

**Results:** Deletion carriers showed increases in fractional anisotropy in the internal capsule and cingulum, and decreases in the posterior thalamic radiation, compared to both duplication carriers and controls (who had intermediate values). Deletion carriers had lower scores across cognitive tasks compared to controls, which were mildly influenced by white matter alterations. Reduced fractional anisotropy in the posterior thalamic radiation partially contributed to worse cognitive performance in deletion carriers.

## Conclusions:

This study, together with our previous findings, provides convergent evidence for a dosage-dependent effect of 15q11.2 BP1-BP2 on white matter microstructure. Additionally, changes in white matter were found to partially mediate cognitive ability in deletion carriers, providing a link between white matter changes in 15q11.2 BP1-BP2 carriers and cognitive function.

# Introduction

Several copy-number variants (CNVs) are associated with neurodevelopmental disorders (NDDs) in genome-wide studies, including intellectual disability (ID), autism spectrum disorder (ASD), epilepsy and schizophrenia (1–3). Altered white matter is common in many NDDs, and has been shown to mediate core cognitive deficits in schizophrenia (4,5). However, whether alterations in white matter microstructure are associated with these CNVs and can explain – at least partly – cognitive deficits in carriers of the risk variants, is not yet fully understood.

Among CNVs associated with NDDs, deletions and duplications at 15q11.2 are the most prevalent in humans, being present in 0.5% to 1.0% of the general population (6,7). 15q11.2 deletions are associated with developmental and motor delays (8), as well as increased susceptibility to attention deficit hyperactivity disorder (ADHD), ASD, schizophrenia, epilepsy (1,9) and congenital heart disease (10–12); whereas the pathogenicity of the corresponding duplication is less clear in population samples, where a significant risk for NDD has not been established (1,3) despite its link to neurodevelopmental phenotypes in clinical samples (13,14). Likewise, carriers of the 15q11.2 deletion unaffected by a diagnosed NDD, still show lower cognitive function than controls (10,15), as well as a higher prevalence of dyslexia and dyscalculia (6,16), whereas carriers of the 15q11.2 duplication perform similarly to controls on many cognitive tasks (15,16).

The 15q11.2 BP1-BP2 interval comprises four genes: nonimprinted in Prader-Willi/Angelman syndrome 1 (*NIPAI*), nonimprinted in Prader-Willi/Angelman syndrome 2 gene (*NIPAI2*), cytoplasmic FMR1 interacting protein 1 (*CYFIP1*), and tubulin gamma complex associated protein 5 (*TUBGCP5*) (17). These genes are expressed in the central nervous system and have been individually associated with multiple disorders: *NIPAI* with autosomal-dominant hereditary spastic paraplegia (18), *NIPAI2* with childhood absence

epilepsy (19), *TUBHGCP5* with ADHD and obsessive-compulsive disorder (9), and *CYFIP1* with increasing susceptibility to ASD (20) and schizophrenia (21). A recent report investigated protein-protein interactions of the four genes in this region and found that their respective encoded proteins interact with each other, and that their predicted functions encompass crucial biological processes that are important for normal neuronal development, plasticity and function (22).

Using diffusion tensor imaging (DTI), we have previously demonstrated an association between 15q11.2 CNV dosage and altered white matter microstructure in an Icelandic sample (16). We found widespread increases of fractional anisotropy (FA) in deletion carriers relative to duplication carriers – with non-carrier controls showing intermediate values – and the largest effects were observed in the posterior limb of the internal capsule (23). The Icelandic gene pool is less heterogeneous than that of most European populations (24), facilitating the reduction of background noise caused by genetic variation (25), but arguably also raising concerns about the replicability of these findings in more genetically diverse, heterogeneous populations (26).

The aim of our study was to ascertain whether the above association between FA and 15q11.2 dosage was also present in a more heterogeneous European population like the UK, and whether FA mediates the known negative association between the 15q11.2 deletion and cognitive performance. To this end, we used a subsample of participants (~30 000) from the UK Biobank ([www.ukbiobank.uk](http://www.ukbiobank.uk)) for whom DTI-derived measures along with genetic data are available. Based on our previous findings, we hypothesized that bidirectional CNV dosage would lead to opposite changes in DTI measures in several white matter tracts, and that these changes could influence cognitive performance in deletion carriers.

# Methods and Materials

## *Participants*

A subsample of participants from the UK Biobank ([www.ukbiobank.ac.uk](http://www.ukbiobank.ac.uk)) was used in this study. Ethical approval was granted by the North West Multi-Centre Ethics committee, and all subjects provided informed consent to participate in the UK Biobank project. Data were released to Cardiff University after application to the UK Biobank (project ref. 17044).

Only participants self-reporting white British or Irish descent and for whom genetic analysis confirmed European ancestry (27) were included (43,099 participants removed). Furthermore, in order to avoid confounding effects of disease, only participants with no personal history – based on self-reported diagnosis from a doctor at any assessment visit or existing hospital records – of neuropsychiatric disorders (i.e. schizophrenia, psychosis, ASD, dementia or ID) or medical/neurological conditions that could impact white matter (i.e. alcohol or other substance dependency, Parkinson's, Alzheimer's, multiple sclerosis or other neurodegenerative conditions) were selected (43,290 participants removed). After applying these exclusions, 416,253 participants remain.

## *Genotyping, CNV calling and CNV quality control*

DNA extraction and processing workflow are described at [https://biobank.ctsu.ox.ac.uk/crystal/crystal/docs/genotyping\\_sample\\_workflow.pdf](https://biobank.ctsu.ox.ac.uk/crystal/crystal/docs/genotyping_sample_workflow.pdf). CNV calling was performed by Kendall *et al.* (28), and quality control parameters are briefly explained in Supplemental Methods. Carriers of CNVs at the 15q11.2 BP1-BP2 locus, and participants with no neurodevelopmental CNVs (NoCNV) were selected. For the NoCNV group, we selected participants that carried none of the 93 CNVs that have previously been associated with NDDs (3,29,30). The 15q11.2 BP1-BP2 interval was manually inspected to

confirm that included the key genes within the region (Table S1). None of the 15q11.2 BP1-BP2 CNV carriers included in this study carried any other large CNVs. Altogether, we found 1519 15q11.2 BP1-BP2 deletion carriers, 1833 duplication carriers, and 370,289 NoCNV carriers in the remaining sample after exclusions and quality control.

### *Diffusion tensor imaging data*

We used standard DTI measures made available by the UK Biobank. Detailed brain imaging protocols can be found in the Biobank brain MRI documentation ([http://biobank.ctsu.ox.ac.uk/crystal/crystal/docs/brain\\_mri.pdf](http://biobank.ctsu.ox.ac.uk/crystal/crystal/docs/brain_mri.pdf)). DTI data were acquired using a multishell approach with two b-values ( $b=1000$  and  $2000 \text{ s/mm}^2$ ). For each diffusion-weighted shell, 50 diffusion-encoding directions were acquired. Tensor fitting utilizes the  $b=1000 \text{ s/mm}^2$  data, leading to the generation of FA, axial diffusivity (AD), radial diffusivity (RD), and mean diffusivity (MD) maps. The DTI maps were used in Tract-Based Spatial statistics (TBSS) processing, and TBSS-derived measures were computed by averaging the skeletonized images of each DTI map within a set of 48 standard-space tract masks defined by the JHU white matter atlas (ICBM-DTI-81) (31).

DTI data were available for 30,930 participants in the UK Biobank; of those 103 were 15q11.2 BP1-BP2 deletion carriers, 119 were 15q11.2 BP1-BP2 duplication carriers, and 29,870 were NoCNV carriers. Participants were aged between 40 and 70 years old, and the numbers of females and males were similar in each group. Demographic information is described in Table 1.

To avoid the potential effect of extreme values that could have resulted from data quality or processing problems, outlier values of FA, AD, RD and MD – defined as values  $\pm 2.5$  standard deviations from each group mean – in each white matter tract were removed from the analyses (for that particular white matter tract).

## *Cognitive data*

Participants of UK Biobank also underwent a series of cognitive tests. We evaluated the performance on seven cognitive tasks – the pairs matching, reaction time, fluid intelligence, digit span, symbol digit substitution, and trail making A and B tasks. Data transformations of cognitive measures taken were performed after assessment of normality, following the approach of Kendall *et al.* (28). All cognitive measures were transformed so that lower values represented poorer performance. Table 3 describes the sample sizes used for each task in our neuroimaging sample. Since cognitive data are available for many more participants in the UK Biobank than those with neuroimaging data, we also report an extended analysis considering the full sample in Table S3. Details about each cognitive task can be found in Supplemental Methods.

## *Statistical analyses*

The mean TBSS-derived measures (FA, AD, RD and MD) from 30 white matter tracts were considered for analyses (Table 2). We focused our analyses on tracts that have previously been associated with psychiatric disorders (32). Statistical analyses were performed in R *version 3.6.3* (R Foundation).

To evaluate group differences in TBSS-derived and cognitive measures, we performed an ANOVA, including age, sex and handedness as covariates. For brain measures we also included brain size (total grey matter + white matter volumes) as a covariate. Following this, *post hoc* pairwise comparisons were performed to measure differences between groups (*deletion vs NoCNV*, *duplication vs NoCNV*, and *deletion vs duplication*). We used the Benjamini and Hochberg (BH) false discovery rate (FDR,  $q=0.05$ ) to account for multiple testing (33), considering the relationship/high degree of concordance between the

various white matter tracts and within the DTI metrics, as well as differing cognitive measures. The interaction between copy-number and age, and between copy-number and sex was also assessed and results are shown in Supplemental Findings and in Tables S4-S7.

Cohen's  $d$  effect sizes were calculated, comparing *deletion vs NoCNV* and *duplication vs NoCNV*, and plotted using diverging bars. Adjusted values for each group were used, regressing out the effects of age, sex, handedness and brain volume using linear regression. Cohen classified effect sizes as negligible ( $d < 0.2$ ), small ( $0.2 < d < 0.5$ ), medium ( $0.5 < d < 0.8$ ), and large ( $d > 0.8$ ) (34).

To assess the degree of overlap between our current findings, in the UK Biobank sample, and our previous findings, in the Icelandic sample (23), we plotted effect sizes from both samples using forest plots. We recalculated the effect sizes from the Icelandic sample using adjusted values for age, sex and brain volume, and only white matter tracts showing group differences in either study are shown (Figures S1 and S2).

Mediation analysis was performed to test the hypothesis that 15q11.2 BP1-BP2 CNV effects on cognition are mediated by white matter abnormalities. Tracts showing a significant association between FA and carrier status were considered, as well as cognitive tasks that were significantly affected in carriers, when compared to NoCNV carriers. Linear regression was used to look at overall effects of white matter on cognitive tasks (including all deletion- and duplication carriers). Mediation analysis was conducted using the mediation package *version 4.4.7* in R, which uses structural equation modelling. We report the proportion of the total effect of copy-number on cognitive performance mediated by FA, with p-values calculated through quasi-Bayesian approximation using 5000 simulations. Age, sex, handedness and brain volume were included as covariates. FDR correction was again applied to account for multiple testing.



## Results

### *Group differences on TBSS-derived measures*

Most differences were seen in the contrast between deletion- and duplication carriers, confirming the reciprocal effect of 15q11.2 BP1-BP2 dosage previously reported on white matter microstructure (23).

15q11.2 BP1-BP2 deletion carriers showed increased FA relative to duplication carriers in ALIC\_L, PLIC\_R, PLIC\_L, C\_HIP\_R and C\_HIP\_L, and decreased FA in fornix and PTR\_R (Figure 1 and Table S2 for descriptive statistics). Deletion carriers also showed increased FA in ALIC\_L, PLIC\_L and C\_HIP\_L, and decreased FA in PTR\_R, when compared to NoCNV carriers. Additionally, deletion carriers showed significant decreases in MD in BCC and UF\_L, and significant decreases in AD in BCC and SCC, when compared to NoCNV carriers. 15q11.2 BP1-BP2 duplication carriers only showed reduced FA in the C\_HIP\_R compared to NoCNV carriers.

The effect sizes for FA were overall small (Cohen's  $d < 0.5$ ) when comparing CNV carriers to NoCNV carriers but were higher when comparing deletion- to duplication carriers, where medium effect sizes (Cohen's  $d > 0.5$ ) were found in C\_HIP\_R, and C\_HIP\_L, underlining the reciprocal CNV dosage effect in these regions (Table S2). For AD, RD and MD, a medium effect size was also seen in the fornix, when comparing deletion- to duplication carriers. Diverging bar plots showing effect sizes for all thirty white matter tracts considered, are shown in Figures S3-S6.

### *Cognitive performance in 15q11.2 CNV carriers*

Deletion- and duplication carriers were affected differently regarding cognitive performance, when compared to NoCNV carriers, in our neuroimaging sample: deletion carriers showed

poorer performance on reaction time, fluid intelligence, symbol substitution and trail making B tasks, whereas duplication carriers achieved a similar level of performance as NoCNV carriers (Table 3). This was also true when considering all participants with cognitive data (Table S3), where deletion carriers showed poorer performance in pairs matching, reaction time, fluid intelligence, digit span, symbol substitution and trail making B tasks; duplication carriers showed poorer performance only in pairs matching task, and no effects on other tasks.

As described above, four white matter tracts (ALIC\_L, PLIC\_L, PTR\_R and C\_HIP\_L) showed FA changes in deletion carriers, and one tract (C\_HIP\_R) in duplication carriers, when compared to NoCNV carriers. Therefore, the effects of these tracts on fluid intelligence, reaction time, symbol substitution and trail making B task performance were tested through regression analysis. FA variation in all these tracts were overall significantly associated with cognitive task performance, where increases in FA were associated with better performance, with the exception of PLIC\_L where no significant associations were found for any of the tasks (Table 4).

We found that ALIC\_L, PTR\_R and C\_HIP\_L partially mediated cognitive performance in deletion carriers. Decreased FA in PTR\_R was found to partially mediate cognitive performance on all four cognitive tasks, accounting for between 2.4% and 6% of the poorer performance of deletion carriers (Table 4). Increased FA in ALIC\_L in deletion carriers was associated with higher scores in reaction time, symbol substitution and trail making B tasks, removing 2.7%, 5%, and 6% of the total effect of the CNV on each task respectively. Similarly, increased FA in C\_HIP\_L removed 2.7%, 2.4% and 2% of the total effect of the CNV on reaction time, fluid intelligence score and symbol substitution, respectively.

# Discussion

This is the largest study to date investigating the effects of the 15q11.2 BP1-BP2 CNV on white matter microstructure, as well as the first study examining how these effects are associated with cognitive ability. Using a large sample from UK Biobank, we found significant CNV dosage effects on TBSS-derived measures, with NoCNV carriers placed between deletion- and duplication carriers in most tracts, suggesting a dosage-dependent effect on white matter. We found more prominent differences between deletion- and NoCNV carriers than between duplication- and NoCNV carriers. These results replicate our previous findings of reciprocal white matter changes in 15q11.2 BP1-BP2 CNV carriers in an Icelandic sample, with larger effect sizes in deletion- than duplication carriers (23). Furthermore, we showed that deletion carriers have poorer cognitive performance, which is partially mediated by FA measures.

Previously, in the Icelandic sample, we found increased FA in deletion carriers in the left inferior longitudinal fasciculus (ILF\_L), PCR\_L, PTR\_R, C.CG\_L, ALIC\_L, PLIC\_R and PLIC\_L, compared to duplication carriers, but no significant differences were found between carriers and non-carriers (23). The UK Biobank data replicated the copy-number effects on ALIC\_L, PLIC\_R and PLIC\_L, where significant increases in FA were seen in deletion carriers, compared to duplication carriers. Additionally, significant differences between deletion- and NoCNV carriers were found in ALIC\_L and PLIC\_L. The ALIC carries anterior thalamic radiation and frontopontine fibers, and has been shown to be associated with emotion, decision making, cognition and motivation (35). The PLIC carries fibers of the PTR, CST, and corticopontine tracts, as well as somatosensory fibers from the thalamus to the primary somatosensory cortex, being an important structure for motor, and sensory pathways (35). In this study, we found an interaction between copy-number and age in ALIC, where FA increased with age in deletion carriers, and differed from the typical

gradual reduction of FA with age (36), that is seen in NoCNV and duplication carriers (Supplemental Findings and Figure S7). The same effect was also found in BCC and SCC. Although these findings could suggest an atypical development of these regions with age, a younger group (from childhood until adulthood) would be needed to reliably investigate the impact of 15q11.2 BP2-BP2 CNVs on white matter development.

Both samples also showed similar effects (increased FA in deletion carriers) in different portions of the cingulum – significant effects were found on C\_CG\_L in the Icelandic sample, and on C\_HIP\_R and C\_HIP\_L in the UK Biobank sample. The cingulum connects components of the limbic system, where different portions reflect distinct functions (37). The hippocampal portion is linked to learning and episodic memory. Conversely, deletion carriers showed reduced FA and increased RD in the fornix, a major output tract of the hippocampus that is also implicated in memory function. Although not significant, deletion carriers in the Icelandic sample also show a decrease in FA in this structure (Figure S1).

We also found some divergence between the two datasets. While deletion carriers showed increased FA in PTR\_R and ILF\_L in the Icelandic sample, they showed reduced FA in the UK Biobank sample, with a significant FA reduction in PTR\_R when compared to NoCNV carriers. Furthermore, when looking at effect sizes in all tracts (Figure S3), we can see an overall pattern of increased FA in deletion carriers in the Icelandic sample (the only exceptions being fornix and bilateral CST), whereas in the UK Biobank the pattern was more heterogeneous. Effect sizes in both samples are shown for AD, RD and MD in Figures S4-S6. Differences between samples could have resulted from several factors, such as variable gene expression, sample and population characteristics, and different resolution and processing approaches for the imaging data.

NDDs have been generally associated with global decreases in FA (32,38,39), which contrasts with the findings of increased FA in 15q11.2 BP1-BP2 deletion carriers. This raises the question of how changes in FA relate to cognitive function and risk for disorder in these carriers. In our neuroimaging sample, deletion carriers performed worse during reaction time, fluid intelligence, symbol substitution, and trail making B tasks, whereas duplication carriers performed at a similar level as NoCNV controls. The same pattern was observed when extending our analyses to all participants with cognitive data available, where additional effects in pairs matching and digit span tasks were seen in deletion carriers, and the biggest effect size was observed in fluid intelligence (Table S3). This pattern of effects is in line with previous studies, where deletion was reported as being more damaging than duplication for a variety of cognitive tests (6,15).

Our analyses showed that FA in white matter structures affected by carrier status correlate positively with cognitive performance in reaction time, fluid intelligence, symbol substitution, and trail making B tasks, with exception of PLIC\_L, which did not correlate with any of the tasks. Mediation analyses revealed that changes in PTR\_R partially mediated the effects of the deletion in all cognitive tasks, where the lower FA seen in deletion carriers in this region contributed to 2–6% of the CNV effect across tasks. The PTR is known to connect the caudal parts of the thalamus to both the parietal and occipital lobes (40), and has been previously indicated as the strongest white matter predictor for fluid intelligence (41). On the other hand, the increased FA seen in ALIC\_L and C\_HIP\_L in deletion carriers seemed to have the opposite effect on cognition, removing part of the CNV effect on performance. These findings suggest that increased FA in these regions contribute to better cognitive performance in deletion carriers.

A recent study used data gathered through the Enhancing Imaging Genetic through Meta-Analysis (ENIGMA) consortium (42) and UK Biobank to determine the effects of the

15q11.2 BP1-BP2 CNV on cortical and subcortical brain morphology. The study reported reduced brain surface area and thicker cortex in deletion carriers, where the significant differences in cortical thickness were more evident in the frontal, cingulate and parietal lobes. Furthermore, this study found significant mediation effects of total surface area and cortical thickness on fluid intelligence, with similar proportions as the ones reported in this study (15). Taken together, these findings suggest that 15q11.2 BP1-BP2 CNV effects on white and grey matter provide partially complementary effects on cognitive ability.

Amongst the four genes in this region, *NIPAI* and *CYFIP1* are known to be involved in mechanisms that, when dysregulated, have the potential to alter white matter. *NIPAI* interacts with the bone morphogenic protein (BMP) receptor type II to inhibit BMP signaling, which contributes to axonal growth, guidance and differentiation (43). Enhanced BMP signaling was found to cause abnormal distal axonal overgrowth at the presynaptic neuromuscular junction in a *Drosophila* model (44). *CYFIP1* is considered a likely contributor to 15q11.2 BP1-BP2- associated phenotypes. Dysregulations in this gene result in alterations in dendritic spine morphology and branching (45,46) as well as myelination (47,48). *CYFIP1* interacts in two distinct complexes (45): the WAVE regulatory complex, which regulates actin remodeling during neural wiring (49), and the *CYFIP1*-eIF4E complex, which through interactions with the fragile X mental retardation 1 protein (FMRP) regulates translation of FMRP-target mRNAs (50). FMRP is the gene product of *FMRI*, which when mutated causes fragile X syndrome (FXS), the most common monogenic form of ID (51).

In our previous study, we hypothesized that *CYFIP1* could be a primary contributor to white matter changes in 15q11.2 BP1-BP2 CNV carriers. Previous DTI studies have shown increased FA in FXS patients (52,53), similar to what we observed in 15q11.2 BP1-BP2 deletion carriers, suggesting that these changes could be in part due to disruptions in the *CYFIP1*-FMRP complex. Recently, we developed a novel *Cyfip1*-haploinsufficient rat line

using CRISPR/Cas9 to assess the contribution of *Cyfp1* to white matter microstructure (47). We found evidence that *Cyfp1* can influence myelination, since *Cyfp1* haploinsufficiency led to decreased FA, myelin thinning in the corpus callosum, and aberrant intracellular distribution of myelin basic protein in cultured oligodendrocytes. These findings contrasted with our previous results, from the Icelandic sample, showing widespread increased FA in 15q11.2 BP1-BP2 deletion carriers. However, in the UK Biobank sample, reduced FA was found in PTR\_R in deletion carriers, which contributed to worse cognitive performance. Decreased FA could indeed result from myelin deficits (54), that could be caused by dysregulations in *CYFIP1*, which could in turn affect cognition (55,56). Conversely, increased FA in ALIC\_L and C\_HIP\_L led to better cognitive performance in deletion carriers, which could be associated with compensatory mechanisms as a response to primary deficits (e.g. in myelination or synapses). It is, however, difficult to speculate at this point, given that the individual or combined influence of the other three genes in this region on white matter is unknown, and disruptions to myelin and/or axons cannot be distinguished with traditional DTI methods.

The effect sizes reported here were overall smaller than the ones in the Icelandic sample. In this study, we compared carriers to thousands of controls, which provides a better estimate of the general population mean, and therefore a more reliable estimate of effect sizes (57). The deletion has been proposed as a pathogenic CNV of mild effect size (58), which is in line with the smaller effect sizes found in the UK Biobank data. In the Icelandic sample, carriers were compared to 19 NoCNV controls, which may have led to an overestimation of the CNV effect. In addition to the different genetic and environmental background in both samples, participants in the UK Biobank were older and the imaging data were collected and processed differently. Although this could explain some of the variability between the samples, it is encouraging that we found overlapping results from different samples,

increasing our confidence of a dosage effect on white matter, particular on the cingulum and internal capsule, which harbor important connections of the limbic system.

It is also important to note that the recruitment in UK Biobank and Icelandic relies on volunteers who put themselves forward to be scanned, which could result in a significant healthy volunteer bias (59). Additionally, in the Icelandic sample, NoCNV controls had similar intelligence quotient scores as carriers. It would then be interesting to compare findings from these two studies with findings from a sample ascertained from clinical services.

## *Conclusion*

We show converging evidence from two independent samples with different genetic and environmental backgrounds, supporting our hypothesis of a mirrored effect of the 15q11.2 BP1-BP2 CNV on white matter microstructure. We further show that changes in white matter partially mediate the cognitive phenotype in deletion carriers, with decreased FA in the PTR contributing to poorer cognitive performance, while increased FA in ALIC and C\_HIP ameliorates, in deletion carriers. This work provides further evidence for gene dosage effects on brain structure and function at the 15q11.2 locus.



## **Acknowledgements**

This research has been conducted using the UK Biobank Resource under Application Number 17044. This research was supported by the Medical Research Council Programme grant ref. G08005009. This work was also supported by a Wellcome Trust Strategic Award 'DEFINE' grant no. 100202/Z/12/Z and core support from the Neuroscience and Mental Health Research Institute, Cardiff University. KMK is supported by a Wellcome Trust Clinical Research Training Fellowship (ref. 201171/Z/16/Z).

## **Disclosures**

MOU, GBW, HS and KS are employees of deCODE genetics/Amgen. The remaining authors declare no conflict of interest.

# References

1. Kirov G. CNVs in neuropsychiatric disorders. Hum Mol Genet [Internet]. 2015 Oct 15 [cited 2020 May 28];24(R1):R45–9. Available from: <https://academic.oup.com/hmg/article/24/R1/R45/671425>
2. Marshall CR, Howrigan DP, Merico D, Thiruvahindrapuram B, Wu W, Greer DS, et al. Contribution of copy number variants to schizophrenia from a genome-wide study of 41,321 subjects. Nat Genet. 2017;49(1):27–35.
3. Coe BP, Witherspoon K, Rosenfeld JA, van Bon BWM, Vulto-van Silfhout AT, Bosco P, et al. Refining analyses of copy number variation identifies specific genes associated with developmental delay. Nature Genetics [Internet]. 2014 Oct [cited 2020 May 29];46(10):1063–71. Available from: <https://www.nature.com/articles/ng.3092>
4. Kochunov P, Coyle TR, Rowland LM, Jahanshad N, Thompson PM, Kelly S, et al. Association of White Matter With Core Cognitive Deficits in Patients With Schizophrenia. JAMA Psychiatry [Internet]. 2017 Sep 1 [cited 2020 Jun 6];74(9):958–66. Available from: <https://jamanetwork.com/journals/jamapsychiatry/fullarticle/2646396>
5. Karbasforoushan H, Duffy B, Blackford JU, Woodward ND. Processing speed impairment in schizophrenia is mediated by white matter integrity. Psychological Medicine [Internet]. 2015 Jan [cited 2020 Jun 6];45(1):109–20. Available from: <https://www.cambridge.org/core/journals/psychological-medicine/article/processing-speed-impairment-in-schizophrenia-is-mediated-by-white-matter-integrity/CF09DF60842A5B5C2FFA87046CC841A5>

6. Stefansson H, Meyer-Lindenberg A, Steinberg S, Magnusdottir B, Morgen K, Arnarsdottir S, et al. CNVs conferring risk of autism or schizophrenia affect cognition in controls. *Nature*. 2014 Jan 16;505(7483):361–6.
7. Crawford K, Bracher-Smith M, Owen D, Kendall KM, Rees E, Pardiñas AF, et al. Medical consequences of pathogenic CNVs in adults: analysis of the UK Biobank. *Journal of Medical Genetics* [Internet]. 2019 Mar 1 [cited 2020 May 29];56(3):131–8. Available from: <https://jmg.bmj.com/content/56/3/131>
8. Butler MG. Clinical and genetic aspects of the 15q11.2 BP1–BP2 microdeletion disorder. *Journal of Intellectual Disability Research* [Internet]. 2017 [cited 2020 May 28];61(6):568–79. Available from: <https://onlinelibrary.wiley.com/doi/abs/10.1111/jir.12382>
9. Cox DM, Butler MG. The 15q11.2 BP1–BP2 Microdeletion Syndrome: A Review. *International Journal of Molecular Sciences* [Internet]. 2015 Feb [cited 2020 Aug 7];16(2):4068–82. Available from: <https://www.mdpi.com/1422-0067/16/2/4068>
10. Williams SG, Nakev A, Guo H, Frain S, Tenin G, Liakhovitskaia A, et al. Association of congenital cardiovascular malformation and neuropsychiatric phenotypes with 15q11.2 (BP1–BP2) deletion in the UK Biobank. *European Journal of Human Genetics* [Internet]. 2020 Apr 23 [cited 2020 May 28];1–9. Available from: <https://www.nature.com/articles/s41431-020-0626-8>
11. Geng J, Picker J, Zheng Z, Zhang X, Wang J, Hisama F, et al. Chromosome microarray testing for patients with congenital heart defects reveals novel disease causing loci and high diagnostic yield. *BMC Genomics* [Internet]. 2014 Dec 17 [cited 2020 May 28];15(1):1127. Available from: <https://doi.org/10.1186/1471-2164-15-1127>

12. Glessner JT, Bick AG, Ito K, Homsy J, Rodriguez-Murillo L, Fromer M, et al. Increased frequency of de novo copy number variants in congenital heart disease by integrative analysis of single nucleotide polymorphism array and exome sequence data. *Circ Res*. 2014 Oct 24;115(10):884–96.
13. Burnside RD, Pasion R, Mikhail FM, Carroll AJ, Robin NH, Youngs EL, et al. Microdeletion/microduplication of proximal 15q11.2 between BP1 and BP2: a susceptibility region for neurological dysfunction including developmental and language delay. *Hum Genet*. 2011 Oct;130(4):517–28.
14. van der Zwaag B, Staal WG, Hochstenbach R, Poot M, Spierenburg HA, de Jonge MV, et al. A co-segregating microduplication of chromosome 15q11.2 pinpoints two risk genes for autism spectrum disorder. *Am J Med Genet B Neuropsychiatr Genet*. 2010 Jun 5;153B(4):960–6.
15. Meer D van der, Sønderby IE, Kaufmann T, Walters GB, Abdellaoui A, Ames D, et al. Association of Copy Number Variation of the 15q11.2 BP1-BP2 Region With Cortical and Subcortical Morphology and Cognition. *JAMA Psychiatry* [Internet]. 2020 Apr 1 [cited 2020 May 27];77(4):420–30. Available from: <https://jamanetwork.com/journals/jamapsychiatry/fullarticle/2753864>
16. Ulfarsson MO, Walters GB, Gustafsson O, Steinberg S, Silva A, Doyle OM, et al. 15q11.2 CNV affects cognitive, structural and functional correlates of dyslexia and dyscalculia. *Transl Psychiatry*. 2017 25;7(4):e1109.
17. Chai J-H, Locke DP, Greally JM, Knoll JHM, Ohta T, Dunai J, et al. Identification of four highly conserved genes between breakpoint hotspots BP1 and BP2 of the Prader-Willi/Angelman syndromes deletion region that have undergone evolutionary

- transposition mediated by flanking duplicons. *Am J Hum Genet.* 2003 Oct;73(4):898–925.
18. Rainier S, Chai J-H, Tokarz D, Nicholls RD, Fink JK. NIPA1 Gene Mutations Cause Autosomal Dominant Hereditary Spastic Paraplegia (SPG6). *Am J Hum Genet* [Internet]. 2003 Oct [cited 2020 Aug 3];73(4):967–71. Available from: <https://www.ncbi.nlm.nih.gov/pmc/articles/PMC1180617/>
  19. Xie H, Zhang Y, Zhang P, Wang J, Wu Y, Wu X, et al. Functional Study of NIPA2 Mutations Identified from the Patients with Childhood Absence Epilepsy. *PLOS ONE* [Internet]. 2014 out [cited 2020 Aug 3];9(10):e109749. Available from: <https://journals.plos.org/plosone/article?id=10.1371/journal.pone.0109749>
  20. Toma C, Torrico B, Hervás A, Valdés-Mas R, Tristán-Noguero A, Padillo V, et al. Exome sequencing in multiplex autism families suggests a major role for heterozygous truncating mutations. *Molecular Psychiatry* [Internet]. 2014 Jul [cited 2020 Aug 3];19(7):784–90. Available from: <https://www.nature.com/articles/mp2013106>
  21. Tam GWC, van de Lagemaat LN, Redon R, Strathdee KE, Croning MDR, Malloy MP, et al. Confirmed rare copy number variants implicate novel genes in schizophrenia. *Biochem Soc Trans.* 2010 Apr;38(2):445–51.
  22. Rafi SK, Butler MG. The 15q11.2 BP1-BP2 Microdeletion (Burnside-Butler) Syndrome: In Silico Analyses of the Four Coding Genes Reveal Functional Associations with Neurodevelopmental Phenotypes. *Int J Mol Sci.* 2020 May 6;21(9).
  23. Silva AI, Ulfarsson MO, Stefansson H, Gustafsson O, Walters GB, Linden DEJ, et al. Reciprocal White Matter Changes Associated With Copy Number Variation at 15q11.2 BP1-BP2: A Diffusion Tensor Imaging Study. *Biological Psychiatry* [Internet]. 2019

- Apr 1 [cited 2020 Jan 17];85(7):563–72. Available from:  
<http://www.sciencedirect.com/science/article/pii/S0006322318320092>
24. Helgason A, Nicholson G, Stefánsson K, Donnelly P. A Reassessment of Genetic Diversity in Icelanders: Strong Evidence from Multiple Loci for Relative Homogeneity Caused by Genetic Drift. *Annals of Human Genetics* [Internet]. 2003 [cited 2020 May 29];67(4):281–97. Available from:  
<https://onlinelibrary.wiley.com/doi/abs/10.1046/j.1469-1809.2003.00046.x>
25. Zeggini E. Using genetically isolated populations to understand the genomic basis of disease. *Genome Med* [Internet]. 2014 Oct 17 [cited 2020 May 29];6(10). Available from: <https://www.ncbi.nlm.nih.gov/pmc/articles/PMC4254420/>
26. Austin MA, Harding S, McElroy C. Genebanks: a comparison of eight proposed international genetic databases. *Community Genet*. 2003;6(1):37–45.
27. Legge SE, Jones HJ, Kendall KM, Pardiñas AF, Menzies G, Bracher-Smith M, et al. Association of Genetic Liability to Psychotic Experiences With Neuropsychotic Disorders and Traits. *JAMA Psychiatry* [Internet]. 2019 Dec 1 [cited 2020 Jul 17];76(12):1256–65. Available from:  
<https://jamanetwork.com/journals/jamapsychiatry/fullarticle/2751531>
28. Kendall KM, Rees E, Escott-Price V, Einon M, Thomas R, Hewitt J, et al. Cognitive Performance Among Carriers of Pathogenic Copy Number Variants: Analysis of 152,000 UK Biobank Subjects. *Biological Psychiatry* [Internet]. 2017 Jul 15 [cited 2020 May 15];82(2):103–10. Available from:  
[https://www.biologicalpsychiatryjournal.com/article/S0006-3223\(16\)32711-1/abstract](https://www.biologicalpsychiatryjournal.com/article/S0006-3223(16)32711-1/abstract)

29. Wang K, Li M, Hadley D, Liu R, Glessner J, Grant SFA, et al. PennCNV: An integrated hidden Markov model designed for high-resolution copy number variation detection in whole-genome SNP genotyping data. *Genome Res* [Internet]. 2007 Nov [cited 2020 May 15];17(11):1665–74. Available from: <https://www.ncbi.nlm.nih.gov/pmc/articles/PMC2045149/>
30. Dittwald P, Gambin T, Szafranski P, Li J, Amato S, Divon MY, et al. NAHR-mediated copy-number variants in a clinical population: Mechanistic insights into both genomic disorders and Mendelizing traits. *Genome Res* [Internet]. 2013 Jan 9 [cited 2020 May 15];23(9):1395–409. Available from: <http://genome.cshlp.org/content/23/9/1395>
31. MRI Atlas of Human White Matter - 1st Edition [Internet]. [cited 2020 May 15]. Available from: <https://www.elsevier.com/books/mri-atlas-of-human-white-matter/mori/978-0-444-51741-8>
32. Koshiyama D, Fukunaga M, Okada N, Morita K, Nemoto K, Usui K, et al. White matter microstructural alterations across four major psychiatric disorders: mega-analysis study in 2937 individuals. *Molecular Psychiatry* [Internet]. 2020 Apr [cited 2020 May 26];25(4):883–95. Available from: <https://www.nature.com/articles/s41380-019-0553-7>
33. Benjamini Y, Hochberg Y. Controlling the False Discovery Rate: A Practical and Powerful Approach to Multiple Testing. *Journal of the Royal Statistical Society: Series B (Methodological)* [Internet]. 1995 [cited 2020 May 15];57(1):289–300. Available from: <https://rss.onlinelibrary.wiley.com/doi/abs/10.1111/j.2517-6161.1995.tb02031.x>
34. Cohen J. CHAPTER 1 - The Concepts of Power Analysis. In: Cohen J, editor. *Statistical Power Analysis for the Behavioral Sciences* [Internet]. Academic Press; 1977 [cited

2020 May 15]. p. 1–17. Available from:

<http://www.sciencedirect.com/science/article/pii/B9780121790608500062>

35. Emos MC, Agarwal S. Neuroanatomy, Internal Capsule. In: StatPearls [Internet]. Treasure Island (FL): StatPearls Publishing; 2020 [cited 2020 May 26]. Available from: <http://www.ncbi.nlm.nih.gov/books/NBK542181/>
36. Krogsrud SK, Fjell AM, Tamnes CK, Grydeland H, Mork L, Due-Tønnessen P, et al. Changes in white matter microstructure in the developing brain--A longitudinal diffusion tensor imaging study of children from 4 to 11years of age. *Neuroimage*. 2016 Jan 1;124(Pt A):473–86.
37. Jones DK, Christiansen KF, Chapman RJ, Aggleton JP. Distinct subdivisions of the cingulum bundle revealed by diffusion MRI fibre tracking: Implications for neuropsychological investigations. *Neuropsychologia* [Internet]. 2013 Jan [cited 2020 May 26];51(1):67–78. Available from: <https://www.ncbi.nlm.nih.gov/pmc/articles/PMC3611599/>
38. Fitzsimmons J, Kubicki M, Shenton ME. Review of functional and anatomical brain connectivity findings in schizophrenia. *Curr Opin Psychiatry*. 2013 Mar;26(2):172–87.
39. Rane P, Cochran D, Hodge SM, Haselgrove C, Kennedy DN, Frazier JA. Connectivity in Autism: A Review of MRI Connectivity Studies. *Harv Rev Psychiatry*. 2015 Aug;23(4):223–44.
40. George K, M Das J. Neuroanatomy, Thalamocortical Radiations. In: StatPearls [Internet]. Treasure Island (FL): StatPearls Publishing; 2020 [cited 2020 Jun 6]. Available from: <http://www.ncbi.nlm.nih.gov/books/NBK546699/>



41. Kievit RA, Fuhrmann D, Borgeest GS, Simpson-Kent IL, Henson RNA. The neural determinants of age-related changes in fluid intelligence: a pre-registered, longitudinal analysis in UK Biobank. Wellcome Open Res [Internet]. 2018 Jun 15 [cited 2020 May 27];3. Available from: <https://www.ncbi.nlm.nih.gov/pmc/articles/PMC5909055/>
42. Thompson PM, Stein JL, Medland SE, Hibar DP, Vasquez AA, Renteria ME, et al. The ENIGMA Consortium: large-scale collaborative analyses of neuroimaging and genetic data. Brain Imaging and Behavior [Internet]. 2014 Jun 1 [cited 2020 Jul 19];8(2):153–82. Available from: <https://doi.org/10.1007/s11682-013-9269-5>
43. Tsang HTH, Edwards TL, Wang X, Connell JW, Davies RJ, Durrington HJ, et al. The hereditary spastic paraplegia proteins NIPA1, spastin and spartin are inhibitors of mammalian BMP signalling. Hum Mol Genet [Internet]. 2009 Oct 15 [cited 2020 May 29];18(20):3805–21. Available from: <https://academic.oup.com/hmg/article/18/20/3805/645710>
44. Wang X, Shaw WR, Tsang HTH, Reid E, O’Kane CJ. Drosophila spichthyin inhibits BMP signaling and regulates synaptic growth and axonal microtubules. Nat Neurosci. 2007 Feb;10(2):177–85.
45. De Rubeis S, Pasciuto E, Li KW, Fernández E, Di Marino D, Buzzi A, et al. CYFIP1 coordinates mRNA translation and cytoskeleton remodeling to ensure proper dendritic spine formation. Neuron. 2013 Sep 18;79(6):1169–82.
46. Pathania M, Davenport EC, Muir J, Sheehan DF, López-Doménech G, Kittler JT. The autism and schizophrenia associated gene CYFIP1 is critical for the maintenance of dendritic complexity and the stabilization of mature spines. Transl Psychiatry. 2014 Mar 25;4:e374.

47. Silva AI, Haddon JE, Syed YA, Trent S, Lin T-CE, Patel Y, et al. Cyfip1 haploinsufficient rats show white matter changes, myelin thinning, abnormal oligodendrocytes and behavioural inflexibility. *Nat Commun* [Internet]. 2019 Aug 1 [cited 2020 Jan 17];10(1):1–13. Available from: <https://www.nature.com/articles/s41467-019-11119-7>
48. Domínguez-Iturza N, Lo AC, Shah D, Armendáriz M, Vannelli A, Mercaldo V, et al. The autism- and schizophrenia-associated protein CYFIP1 regulates bilateral brain connectivity and behaviour. *Nat Commun* [Internet]. 2019 Aug 1 [cited 2020 Jan 17];10(1):1–13. Available from: <https://www.nature.com/articles/s41467-019-11203-y>
49. Chen Z, Borek D, Padrick SB, Gomez TS, Metlagel Z, Ismail AM, et al. Structure and control of the actin regulatory WAVE complex. *Nature* [Internet]. 2010 Nov [cited 2020 May 29];468(7323):533–8. Available from: <https://www.nature.com/articles/nature09623>
50. Napoli I, Mercaldo V, Boyl PP, Eleuteri B, Zalfa F, De Rubeis S, et al. The Fragile X Syndrome Protein Represses Activity-Dependent Translation through CYFIP1, a New 4E-BP. *Cell* [Internet]. 2008 Sep 19 [cited 2020 May 29];134(6):1042–54. Available from: <http://www.sciencedirect.com/science/article/pii/S0092867408009513>
51. Lozano R, Rosero CA, Hagerman RJ. Fragile X spectrum disorders. *Intractable Rare Dis Res*. 2014 Nov;3(4):134–46.
52. Hall SS, Dougherty RF, Reiss AL. Profiles of aberrant white matter microstructure in fragile X syndrome. *Neuroimage Clin* [Internet]. 2016 Jan 14 [cited 2020 May 27];11:133–8. Available from: <https://www.ncbi.nlm.nih.gov/pmc/articles/PMC4753809/>

53. Green T, Barnea-Goraly N, Raman M, Hall SS, Lightbody AA, Bruno JL, et al. Specific effect of the fragile-X mental retardation-1 gene (FMR1) on white matter microstructure. *Br J Psychiatry* [Internet]. 2015 Aug [cited 2020 May 27];207(2):143–8. Available from: <https://www.ncbi.nlm.nih.gov/pmc/articles/PMC4523928/>
54. Alba-Ferrara LM, de Erausquin GA. What does anisotropy measure? Insights from increased and decreased anisotropy in selective fiber tracts in schizophrenia. *Front Integr Neurosci* [Internet]. 2013 Mar 11 [cited 2020 Jun 23];7. Available from: <https://www.ncbi.nlm.nih.gov/pmc/articles/PMC3593197/>
55. Fields RD. White matter in learning, cognition and psychiatric disorders. *Trends Neurosci* [Internet]. 2008 Jul [cited 2020 Jun 11];31(7):361–70. Available from: <https://www.ncbi.nlm.nih.gov/pmc/articles/PMC2486416/>
56. Fields RD. A new mechanism of nervous system plasticity: activity-dependent myelination. *Nature Reviews Neuroscience* [Internet]. 2015 Dec [cited 2020 Apr 14];16(12):756–67. Available from: <https://www.nature.com/articles/nrn4023>
57. Ferguson CJ. An effect size primer: A guide for clinicians and researchers. Washington, DC, US: American Psychological Association; 2016. 301 p. (Methodological issues and strategies in clinical research, 4th ed).
58. Jøneh AE, Douard E, Moreau C, Dijck AV, Passeggeri M, Kooy F, et al. Estimating the effect size of the 15Q11.2 BP1–BP2 deletion and its contribution to neurodevelopmental symptoms: recommendations for practice. *Journal of Medical Genetics* [Internet]. 2019 Aug 26 [cited 2020 May 15]; Available from: <https://jmg.bmj.com/content/early/2019/08/26/jmedgenet-2018-105879>

59. Fry A, Littlejohns TJ, Sudlow C, Doherty N, Adamska L, Sprosen T, et al. Comparison of Sociodemographic and Health-Related Characteristics of UK Biobank Participants With Those of the General Population. *Am J Epidemiol* [Internet]. 2017 Nov 1 [cited 2020 Aug 3];186(9):1026–34. Available from: <https://www.ncbi.nlm.nih.gov/pmc/articles/PMC5860371/>

## Tables

**Table 1** – Demographic characteristics of individuals with neuroimaging data available from the UK Biobank, after exclusion of individuals with a known brain disorder, and after quality control of genotyping data (see methods for exclusion criteria). Details from the Icelandic sample, used in our previous study, are shown for comparison.

**Abbreviations used:** CNV, copy-number variants; NoCNV, no pathogenic CNVs.

|             |                | 15q11.2 BP1-BP2 CNV |             |             | Test statistic <sup>a</sup> | p-value |
|-------------|----------------|---------------------|-------------|-------------|-----------------------------|---------|
|             |                | Deletion            | NoCNV       | Duplication |                             |         |
| UK Biobank  | Total          | 103                 | 29870       | 119         |                             |         |
|             | male, no. (%)  | 56 (54%)            | 14043 (47%) | 55 (46%)    | $\chi^2 = 2.26$             | 0.33    |
|             | Age, mean (SD) | 55.3 (7.3)          | 54.9 (7.4)  | 54.8 (7.0)  | F = 0.19                    | 0.83    |
|             | range          | 40-68               | 40-70       | 40-69       |                             |         |
| deCODE (23) | Total          | 30                  | 19          | 27          |                             |         |
|             | male, no. (%)  | 14 (47%)            | 12 (63%)    | 12 (44)     | $\chi^2 = 1.78$             | 0.41    |
|             | Age, mean (SD) | 42.8 (12.5)         | 38.9 (10.6) | 43.5 (13.5) | F = 0.026                   | 0.87    |
|             | range          | 21-65               | 22-59       | 22-65       |                             |         |

<sup>a</sup> Statistical differences in sex and age between each group (deletion, NoCNV and duplication) were assessed using  $\chi^2$  test and ANOVA, respectively.

**Table 2** – The 30 white matter tracts selected for this study and the abbreviations.

| White matter tracts                                                           | Abbreviations    |
|-------------------------------------------------------------------------------|------------------|
| Genu Corpus Callosum                                                          | GCC              |
| Body Corpus Callosum                                                          | BCC              |
| Splenium Corpus Callosum                                                      | SCC              |
| Fornix                                                                        | Fornix           |
| Corticospinal tract - Right and left                                          | CST_R; CST_L     |
| Anterior Limb of the Internal Capsule - right and left                        | ALIC_R; ALIC_L   |
| Posterior Limb of the Internal Capsule - right and left                       | PLIC_R; PLIC_L   |
| Anterior Corona Radiata - right and left                                      | ACR_R; ACR_L     |
| Superior Corona Radiata - right and left                                      | SCR_R; SCR_L     |
| Posterior Corona Radiata - right and left                                     | PCR_R; PCR_L     |
| Posterior Thalamic Radiation - right and left                                 | PTR_R; PTR_L     |
| Sagittal Stratum (includes inferior longitudinal fasciculus) - right and left | SS_R; SS_L       |
| External Capsule - right and left                                             | EC_R; EC_L       |
| Cingulum (cingulate gyrus portion) - right and left                           | C_CG_R; C_CG_L   |
| Cingulum (hippocampus portion) - right and left                               | C_HIP_R; C_HIP_L |
| Superior Longitudinal Fasciculus - right and left                             | SLF_R; SLF_L     |
| Uncinate Fasciculus - right and left                                          | UF_R; UF_L       |

**Table 3** - Effects of 15q11.2 BP1-BP2 copy-number variation on seven cognitive tasks from the UK Biobank. Only individuals that were used in the neuroimaging analysis were considered. Group differences were assessed using an ANOVA followed by *post hoc* pairwise comparisons, and corrected using FDR correction. Both uncorrected and corrected (BH corr.) p-values are shown.

**Abbreviations used:** Del, deletion; Dup, duplication; NoCNV, no pathogenic copy-number variants.

|                     | 15q11.2 BP1-BP2 CNV |            |          | Deletion vs NoCNV |         |                    | Duplication vs NoCNV |         |                    | Dosage                 |         |
|---------------------|---------------------|------------|----------|-------------------|---------|--------------------|----------------------|---------|--------------------|------------------------|---------|
|                     | Del, No.            | NoCNV, No. | Dup, No. | Cohen's d (SE)    | p-value | p-value (BH corr.) | Cohen's d (SE)       | p-value | p-value (BH corr.) | F statistic            | p-value |
| Pairs matching      | 103                 | 29497      | 118      | -0.06 (0.19)      | 0.54    | 0.63               | 0.002 (0.18)         | 0.98    | 0.98               | $F_{(2,29710)} = 0.23$ | 0.79    |
| Reaction time       | 103                 | 29815      | 119      | -0.34 (0.19)      | 0.0006  | <b>0.007</b>       | 0.16 (0.18)          | 0.09    | 0.17               | $F_{(2,30029)} = 7.40$ | 0.0006  |
| Fluid intelligence  | 90                  | 27532      | 114      | -0.33 (0.21)      | 0.0018  | <b>0.01</b>        | -0.06 (0.18)         | 0.49    | 0.6                | $F_{(2,27728)} = 4.86$ | 0.008   |
| Digit span          | 72                  | 20433      | 87       | -0.28 (0.23)      | 0.02    | 0.05               | -0.11 (0.21)         | 0.32    | 0.48               | $F_{(2,20584)} = 3.07$ | 0.05    |
| Symbol substitution | 62                  | 15600      | 59       | -0.36 (0.25)      | 0.005   | <b>0.02</b>        | 0.10 (0.26)          | 0.44    | 0.57               | $F_{(2,15713)} = 4.50$ | 0.01    |
| Trail making A      | 52                  | 13966      | 52       | -0.29 (0.27)      | 0.04    | 0.09               | -0.07 (0.27)         | 0.59    | 0.65               | $F_{(2,14062)} = 2.69$ | 0.07    |
| Trail making B      | 52                  | 13966      | 52       | -0.40 (0.27)      | 0.004   | <b>0.02</b>        | 0.11 (0.27)          | 0.42    | 0.57               | $F_{(2,14062)} = 5.15$ | 0.006   |

**Table 4** – Mediation analysis showing the proportion of the total effect of 15q11.2 BP1-BP2 CNV on reaction time, fluid intelligence, symbol substitution and trail making B, mediated by fractional anisotropy (FA) from different white matter tracts. Negative proportions indicate opposite signs between the mediator (FA) and the total effect (CNV effect on cognitive measure). The linear regression (Path B) shows the overall effects of white matter on cognition (including all deletion- and duplication carriers). Both uncorrected and corrected (BH corr.) p-values are shown.

**Abbreviations used:** WM, white matter; Del, deletion; Dup, duplication; NoCNV, no pathogenic copy-number variants.

| Path B                          |               |                    | Mediation effects       |         |                    |              |
|---------------------------------|---------------|--------------------|-------------------------|---------|--------------------|--------------|
| WM tracts                       | $\beta$ (SE)  | p-value (BH corr.) | Prop. Mediated [CI]     | p-value | p-value (BH corr.) | Comparison   |
| <u>Reaction Time</u>            |               |                    |                         |         |                    |              |
| ALIC_L                          | 0.03 (0.006)  | <b>1.16e-06</b>    | -0.027 [-0.07, -0.01]   | 0.003   | <b>0.01</b>        | Del vs NoCNV |
| PLIC_L                          | 0.002 (0.006) | 0.75               | -0.001 [-0.02, 0.01]    | 0.75    | 0.82               |              |
| PTR_R                           | 0.03 (0.006)  | <b>4.02e-05</b>    | 0.024 [0.008, 0.07]     | 8e-04   | <b>0.01</b>        |              |
| C_HIP_L                         | 0.02 (0.006)  | <b>0.001</b>       | -0.027 [-0.08, -0.01]   | 0.0016  | <b>0.01</b>        |              |
| C_HIP_R                         | 0.03 (0.006)  | <b>1.08e-05</b>    | -0.047 [-0.39, 0.24]    | 0.1     | 0.1                | Dup vs NoCNV |
| <u>Fluid Intelligence score</u> |               |                    |                         |         |                    |              |
| ALIC_L                          | 0.03 (0.006)  | <b>3.97e-06</b>    | -0.019 [-0.07, -0.0009] | 0.05    | 0.07               | Del vs NoCNV |
| PLIC_L                          | 0.02 (0.006)  | 0.01               | -0.011 [-0.04, -0.003]  | 0.03    | 0.05               |              |
| PTR_R                           | 0.05 (0.006)  | <b>2.69e-12</b>    | 0.044 [0.016, 0.13]     | 0.002   | <b>0.01</b>        |              |
| C_HIP_L                         | 0.02 (0.006)  | <b>0.002</b>       | -0.024 [-0.07, -0.01]   | 0.003   | <b>0.01</b>        |              |
| C_HIP_R                         | 0.03 (0.006)  | <b>7.05e-06</b>    | 0.047 [-1.45, 1.45]     | 0.8     | 0.8                | Dup vs NoCNV |
| <u>Symbol substitution</u>      |               |                    |                         |         |                    |              |
| ALIC_L                          | 0.04 (0.007)  | <b>1.86e-08</b>    | -0.05 [-0.18, -0.01]    | 0.008   | <b>0.02</b>        | Del vs NoCNV |
| PLIC_L                          | 0.01 (0.007)  | 0.1                | -0.009 [-0.05, 0]       | 0.12    | 0.2                |              |
| PTR_R                           | 0.06 (0.007)  | <b>2.8e-13</b>     | 0.06 [0.02, 0.2]        | 0.009   | <b>0.02</b>        |              |



|                       |               |                 |                      |       |             |              |
|-----------------------|---------------|-----------------|----------------------|-------|-------------|--------------|
| C_HIP_L               | 0.02 (0.008)  | <b>0.002</b>    | -0.02 [-0.09, 0]     | 0.01  | <b>0.02</b> |              |
| C_HIP_R               | 0.02 (0.008)  | 0.05            | -0.02 [-0.4, 0.4]    | 0.4   | 0.5         | Dup vs NoCNV |
| <u>Trail Making B</u> |               |                 |                      |       |             |              |
| ALIC_L                | 0.04 (0.008)  | <b>2.92e-06</b> | -0.06 [-0.2, -0.02]  | 0.008 | <b>0.02</b> |              |
| PLIC_L                | 0.01 (0.008)  | 0.2             | -0.009 [-0.05, 0.01] | 0.2   | 0.2         |              |
| PTR_R                 | 0.05 (0.008)  | <b>1.68e-09</b> | 0.04 [-0.008, 0.2]   | 0.02  | <b>0.04</b> | Del vs NoCNV |
| C_HIP_L               | 0.01 (0.008)  | 0.2             | -0.01 [-0.05, 0.01]  | 0.1   | 0.2         |              |
| C_HIP_R               | 0.002 (0.008) | 0.7             | -0.002 [-0.1, 0.07]  | 0.8   | 0.8         | Dup vs NoCNV |

## Figure legends

**Figure 1** - Boxplots showing the effects of 15q11.2 BP1-BP2 copy-number variation on TBSS-derived measures. Group differences between deletion (n=103), NoCNVs (n=29,870) and duplication (n=119) carriers were assessed with a linear regression followed by *post hoc* pairwise comparisons. Here, only white matter tracts showing significant group differences after FDR correction for multiple comparisons, are shown. Statistics are documented in Table S2.

Fractional Anisotropy

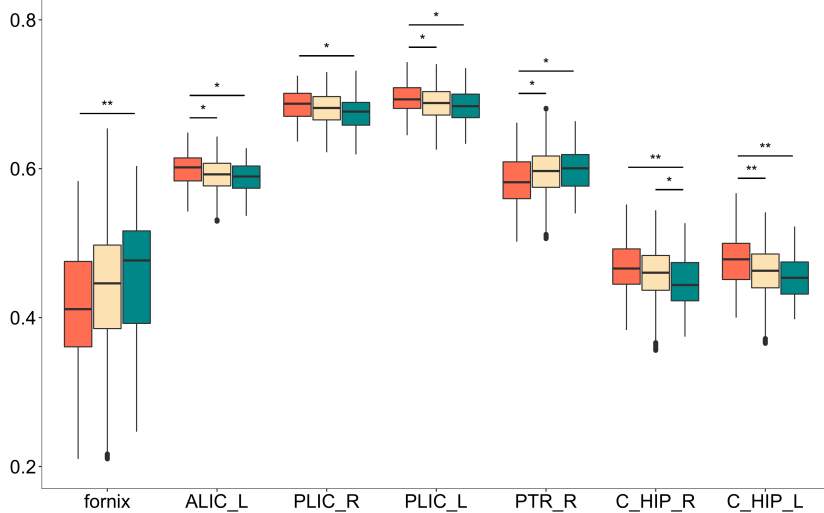

Mean Diffusivity

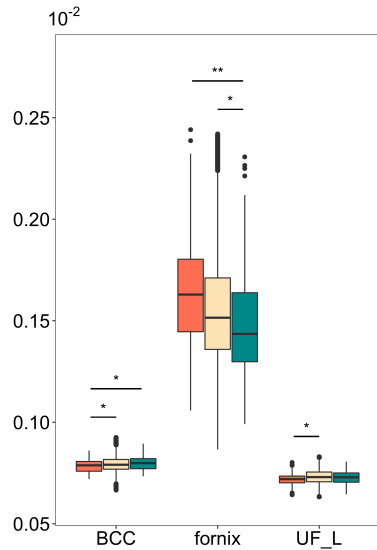

Axial Diffusivity

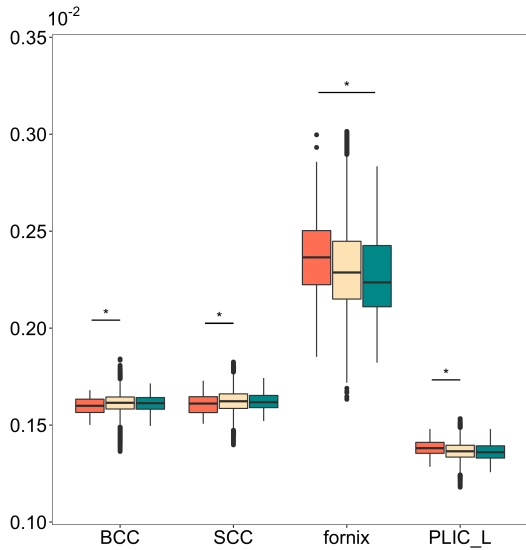

Radial Diffusivity

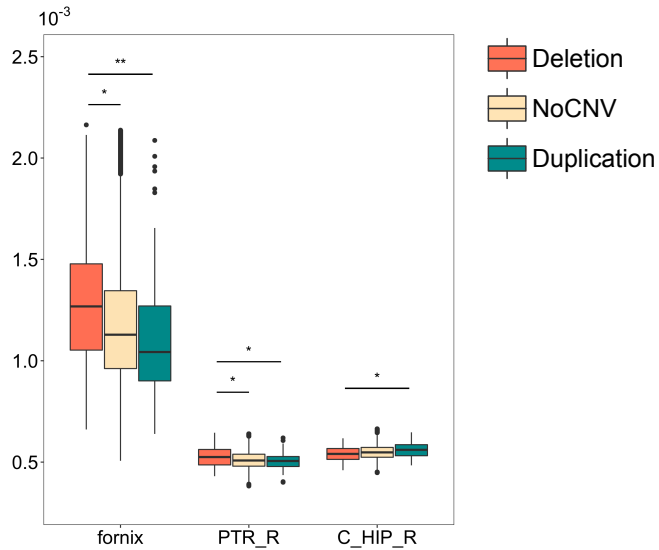

Deletion  
NoCNV  
Duplication
